# Supplementary material for: Observations and WRF simulations of fog events at the Spanish Northern Plateau
Source: Copernicus journal article supplement (doi:10.5194/asr-8-11-2012), 2012-02-28
Supplement: Supplementary file 1 [file asr-8-11-2012-supplement.zip]

Archive with 3 entries (3 files):
- Supplemental Information 1.pdf
- Supplemental Information 2.pdf
- Supplemental Information 3.pdf
