# Supplementary material for: Observations and WRF simulations of fog events at the Spanish Northern Plateau
Source: Copernicus journal article supplement (doi:10.5194/asr-8-11-2012), 2012-02-28
Supplement: Supplementary file 1 [file asr-8-11-2012-supplement.zip › Supplemental Information 1.pdf]

# NOVEMBER 2009

10NOV2009 00Z

500 hPa Geopotential (gpm) und Bodendruck (hPa)

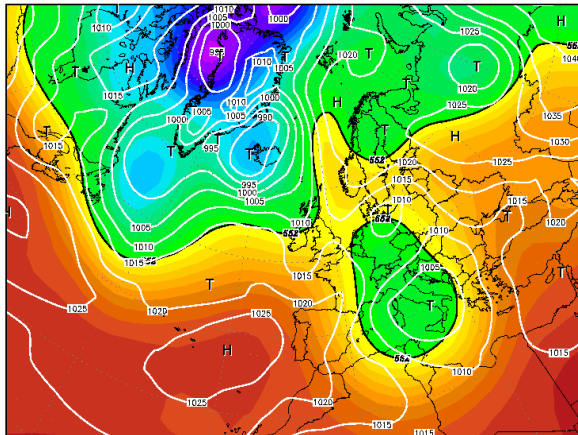

Daten: Reanalyse des NCEP  
(C) Wetterzentrale  
www.wetterzentrale.de

11NOV2009 00Z

500 hPa Geopotential (gpm) und Bodendruck (hPa)

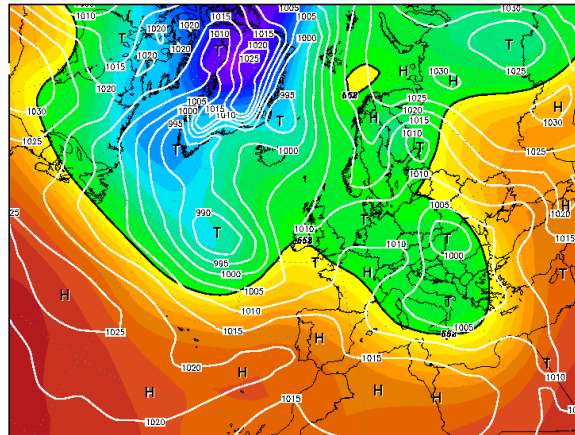

Daten: Reanalyse des NCEP  
(C) Wetterzentrale  
www.wetterzentrale.de

12NOV2009 00Z

500 hPa Geopotential (gpm) und Bodendruck (hPa)

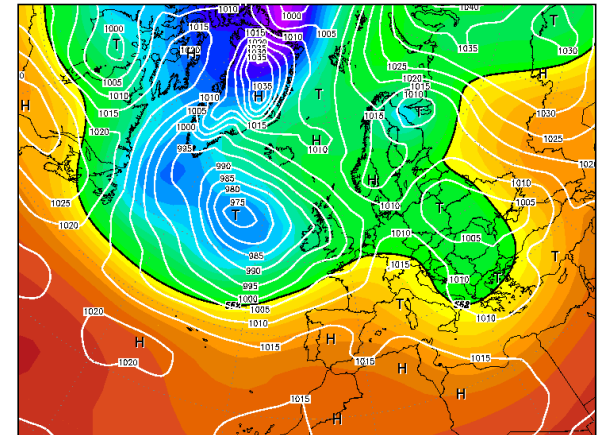

Daten: Reanalyse des NCEP  
(C) Wetterzentrale  
www.wetterzentrale.de

10NOV2009 00Z

850 hPa Temperatur (Grad C)

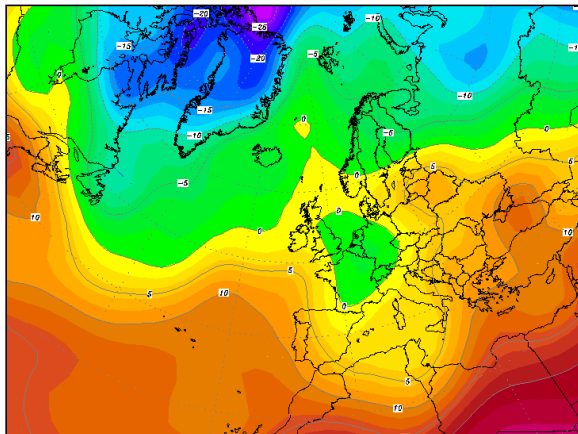

Daten: Reanalyse des NCEP  
(C) Wetterzentrale  
www.wetterzentrale.de

11NOV2009 00Z

850 hPa Temperatur (Grad C)

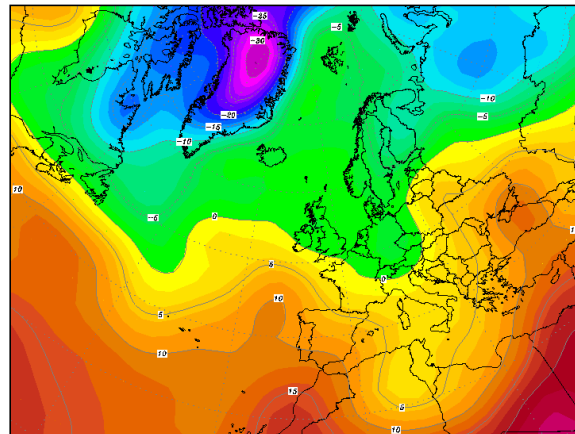

Daten: Reanalyse des NCEP  
(C) Wetterzentrale  
www.wetterzentrale.de

12NOV2009 00Z

850 hPa Temperatur (Grad C)

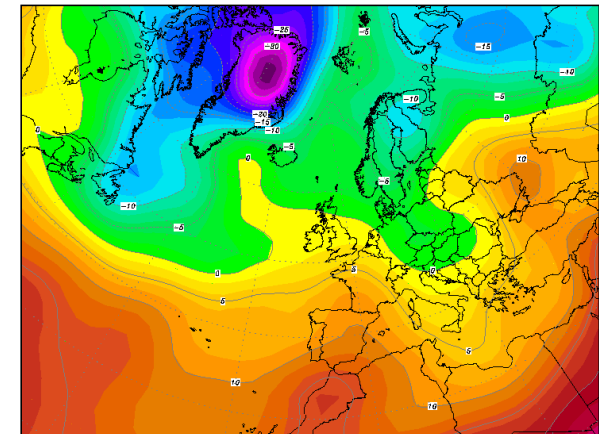

Daten: Reanalyse des NCEP  
(C) Wetterzentrale  
www.wetterzentrale.de

Figure 1 – Synoptic situation. Geopotential at 500hPa and surface pressure (up) and temperature at 850 hPa (down) for 10, 11 and 12 November 2009 (from left to right).

# DECEMBER 2009

10DEC2009 00Z  
500 hPa Geopotential (gpm) und Bodendruck (hPa)

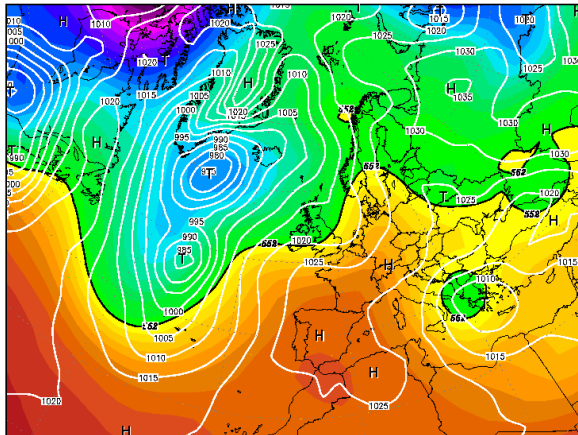

Daten: Reanalyse des NCEP  
(C) Wetterzentrale  
www.wetterzentrale.de

11DEC2009 00Z  
500 hPa Geopotential (gpm) und Bodendruck (hPa)

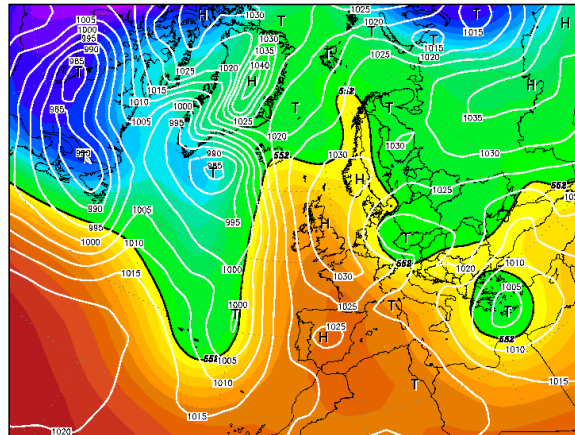

Daten: Reanalyse des NCEP  
(C) Wetterzentrale  
www.wetterzentrale.de

12DEC2009 00Z  
500 hPa Geopotential (gpm) und Bodendruck (hPa)

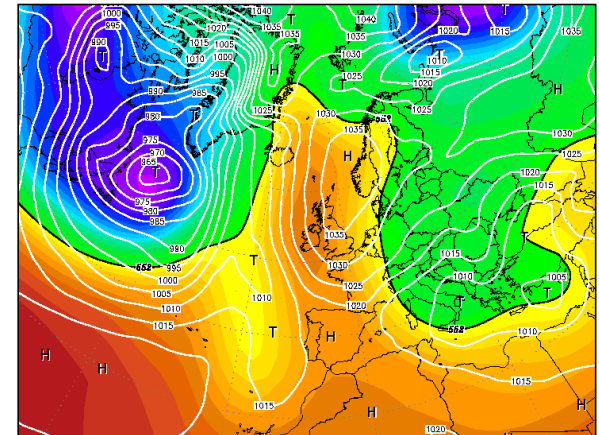

Daten: Reanalyse des NCEP  
(C) Wetterzentrale  
www.wetterzentrale.de

10DEC2009 00Z  
850 hPa Temperatur (Grad C)

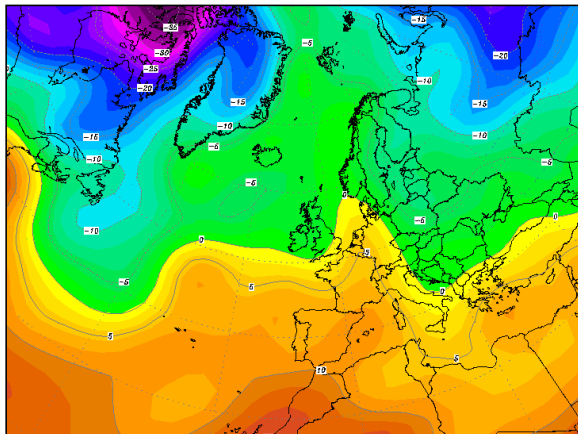

Daten: Reanalyse des NCEP  
(C) Wetterzentrale  
www.wetterzentrale.de

11DEC2009 00Z  
850 hPa Temperatur (Grad C)

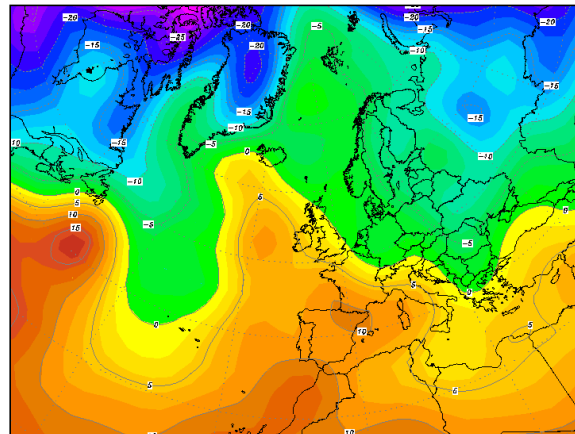

Daten: Reanalyse des NCEP  
(C) Wetterzentrale  
www.wetterzentrale.de

12DEC2009 00Z  
850 hPa Temperatur (Grad C)

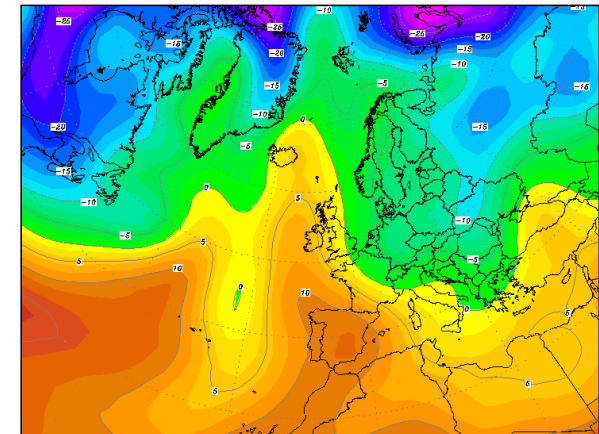

Daten: Reanalyse des NCEP  
(C) Wetterzentrale  
www.wetterzentrale.de

Figure 2 – Synoptic situation. Geopotential at 500hPa and surface pressure (up) and temperature at 850 hPa (down) for 10, 11 and 12 December 2009 (from left to right).

# NOVEMBER 2010

04NOV2010 00Z  
500 hPa Geopotential (gpm) und Bodendruck (hPa)

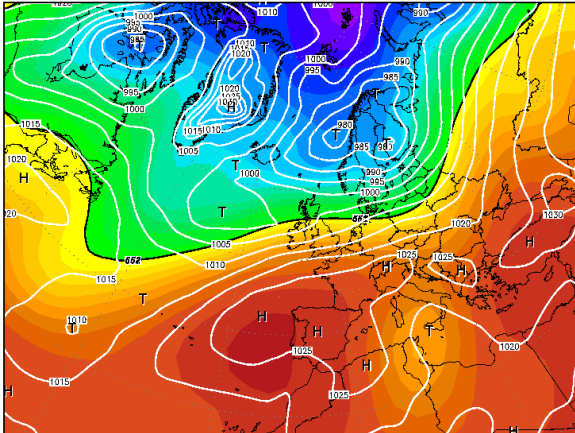

Daten: Reanalysis des NCEP  
(C) Wetterzentrale  
www.wetterzentrale.de

05NOV2010 00Z  
500 hPa Geopotential (gpm) und Bodendruck (hPa)

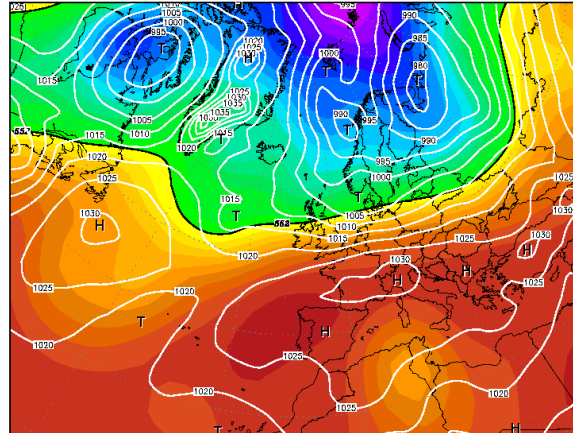

Daten: Reanalysis des NCEP  
(C) Wetterzentrale  
www.wetterzentrale.de

06NOV2010 00Z  
500 hPa Geopotential (gpm) und Bodendruck (hPa)

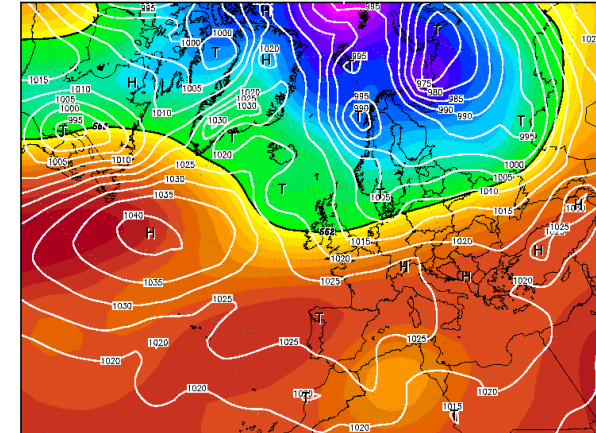

Daten: Reanalysis des NCEP  
(C) Wetterzentrale  
www.wetterzentrale.de

04NOV2010 00Z  
850 hPa Temperatur (Grad C)

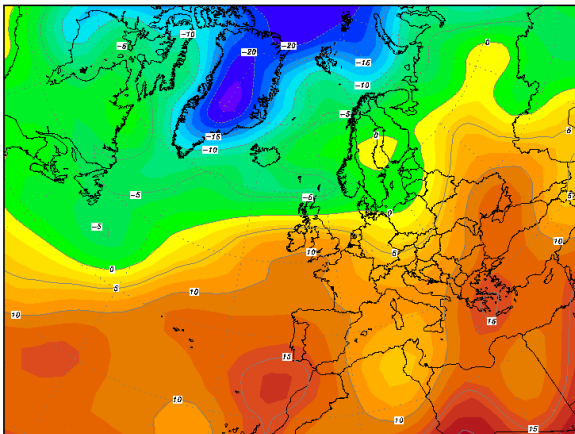

Daten: Reanalysis des NCEP  
(C) Wetterzentrale  
www.wetterzentrale.de

05NOV2010 00Z  
850 hPa Temperatur (Grad C)

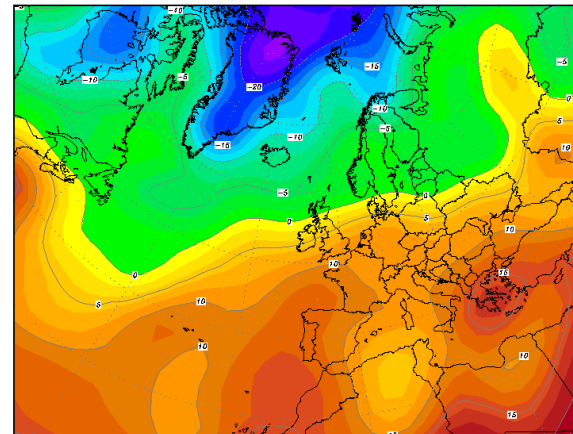

Daten: Reanalysis des NCEP  
(C) Wetterzentrale  
www.wetterzentrale.de

06NOV2010 00Z  
850 hPa Temperatur (Grad C)

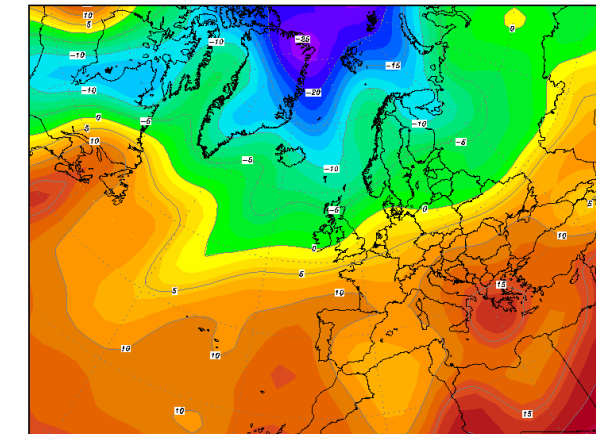

Daten: Reanalysis des NCEP  
(C) Wetterzentrale  
www.wetterzentrale.de

Figure 3 – Synoptic situation. Geopotential at 500hPa and surface pressure (up) and temperature at 850 hPa (down) for 4, 5 and 6 November 2010 (from left to right).
