# Supplementary material for: Observations and WRF simulations of fog events at the Spanish Northern Plateau
Source: Copernicus journal article supplement (doi:10.5194/asr-8-11-2012), 2012-02-28
Supplement: Supplementary file 1 [file asr-8-11-2012-supplement.zip › Supplemental Information 2.pdf]

# NOVEMBER 2009

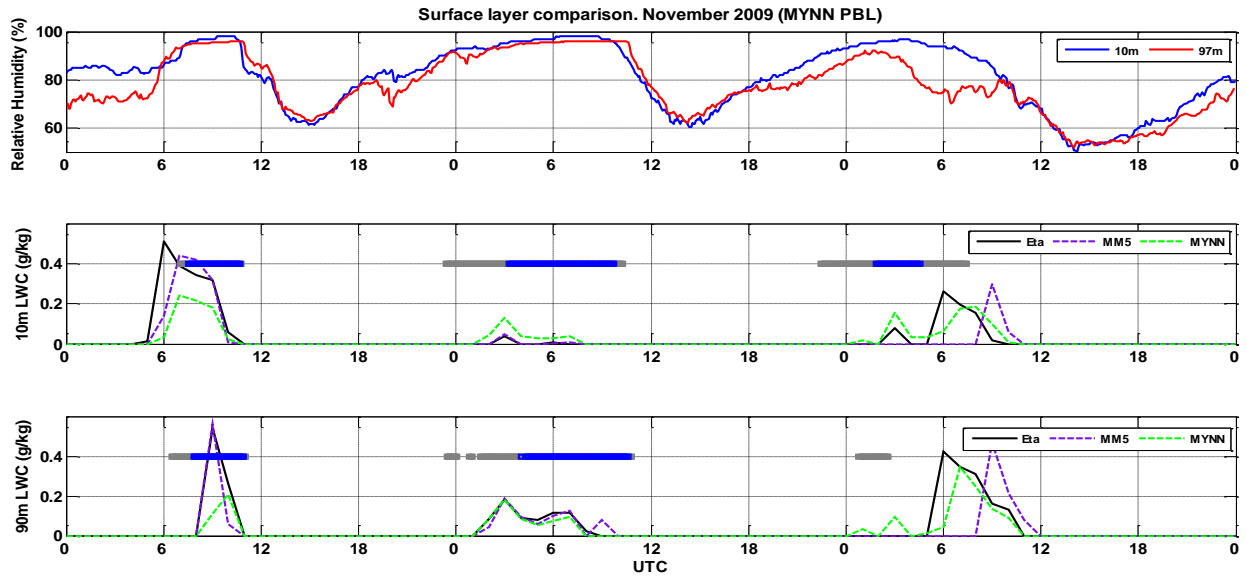

Figure 1 - Surface Layer (SL) parameterization comparison for 10, 11 and 12 November 2009 at CIBA (MYNN PBL parameterization used). a) Observed relative humidity at 10m (blue line) and 97m (red line). b) Simulated LWC at 10m for Eta SL parameterization (black line), MM5 SL parameterization (dashed purple line) and MYNN SL parameterization (dashed green line). Blue and grey bars indicate moments with observed relative humidity at 10m larger than 95% and 90% respectively. c) Same as b for 90m. Blue and grey rectangles indicate the same as in b but for 97m.

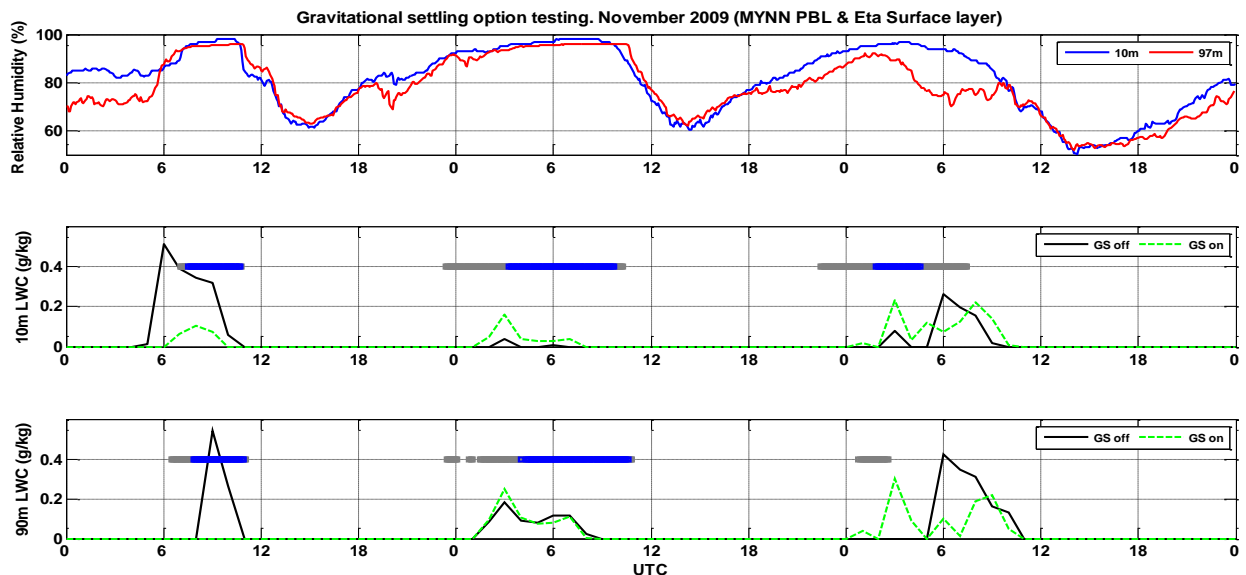

Figure 2 - Gravitational settling (GS) testing for MYNN PBL parameterization and Eta SL parameterization for 10, 11 and 12 November 2009 at CIBA. a) Observed relative humidity at 10m (blue line) and 97m (red line). b) Simulated LWC at 10m without GS option (black line) and with GS option (dashed green line). Blue and grey bars indicate moments with observed relative humidity at 10m larger than 95% and 90% respectively. c) Same as b for 97m. Blue and grey rectangles indicate the same as in b but for 97m.

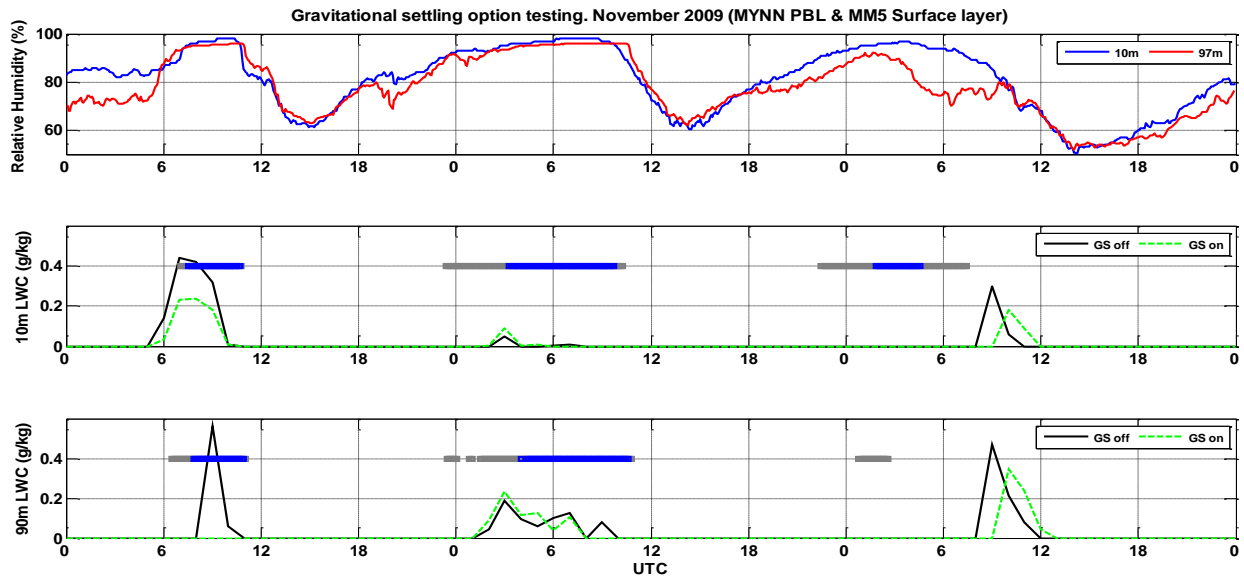

Figure 3 - Gravitational settling (GS) testing for MYNN PBL parameterization and MM5 SL parameterization for 10, 11 and 12 November 2009 at CIBA. a) Observed relative humidity at 10m (blue line) and 97m (red line). b) Simulated LWC at 10m without GS option (black line) and with GS option (dashed green line). Blue and grey bars indicate moments with observed relative humidity at 10m larger than 95% and 90% respectively. c) Same as b for 97m. Blue and grey rectangles indicate the same as in b but for 97m.

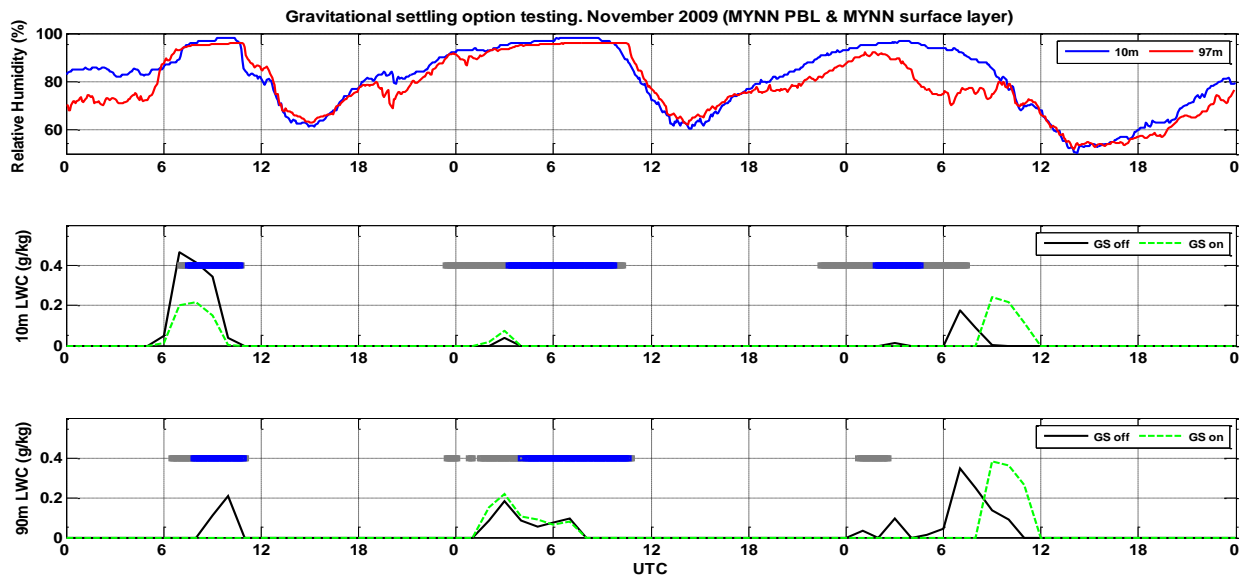

Figure 4 - Gravitational settling (GS) testing for MYNN PBL parameterization and MYNN SL parameterization for 10, 11 and 12 November 2009 at CIBA. a) Observed relative humidity at 10m (blue line) and 97m (red line). b) Simulated LWC at 10m without GS option (black line) and with GS option (dashed green line). Blue and grey bars indicate moments with observed relative humidity at 10m larger than 95% and 90% respectively. c) Same as b for 97m. Blue and grey rectangles indicate the same as in b but for 97m.

# DECEMBER 2009

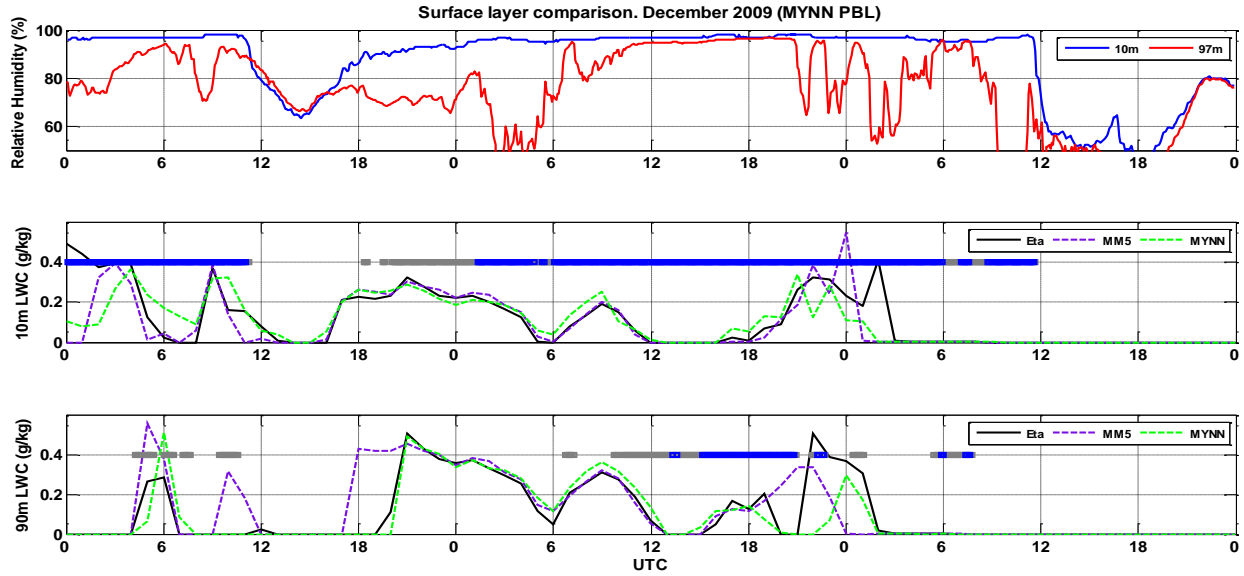

Figure 5 - Surface Layer (SL) parameterization comparison for 10, 11 and 12 December 2009 at CIBA (MYNN PBL parameterization used). a) Observed relative humidity at 10m (blue line) and 97m (red line). b) Simulated LWC at 10m for Eta SL parameterization (black line), MM5 SL parameterization (dashed purple line) and MYNN SL parameterization (dashed green line). Blue and grey bars indicate moments with observed relative humidity at 10m larger than 95% and 90% respectively. c) Same as b for 90m. Blue and grey rectangles indicate the same as in b but for 97m.

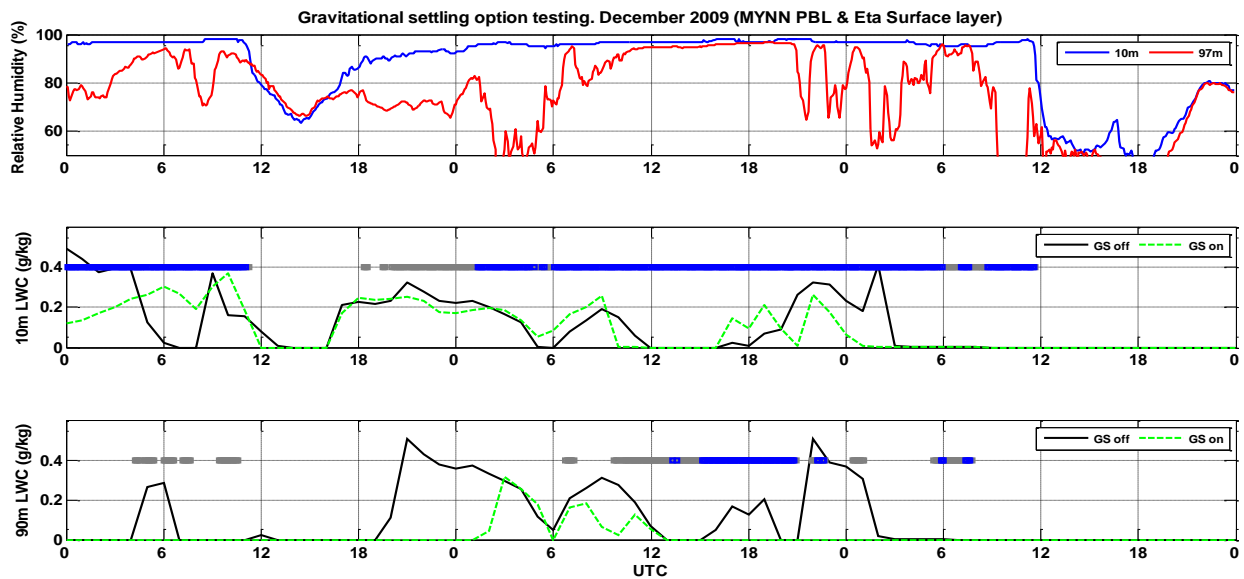

Fig 6 - Gravitational settling (GS) testing for MYNN PBL parameterization and Eta SL parameterization for 10, 11 and 12 December 2009 at CIBA. a) Observed relative humidity at 10m (blue line) and 97m (red line). b) Simulated LWC at 10m without GS option (black line) and with GS option (dashed green line). Blue and grey bars indicate moments with observed relative humidity at 10m larger than 95% and 90% respectively. c) Same as b for 97m. Blue and grey rectangles indicate the same as in b but for 97m.

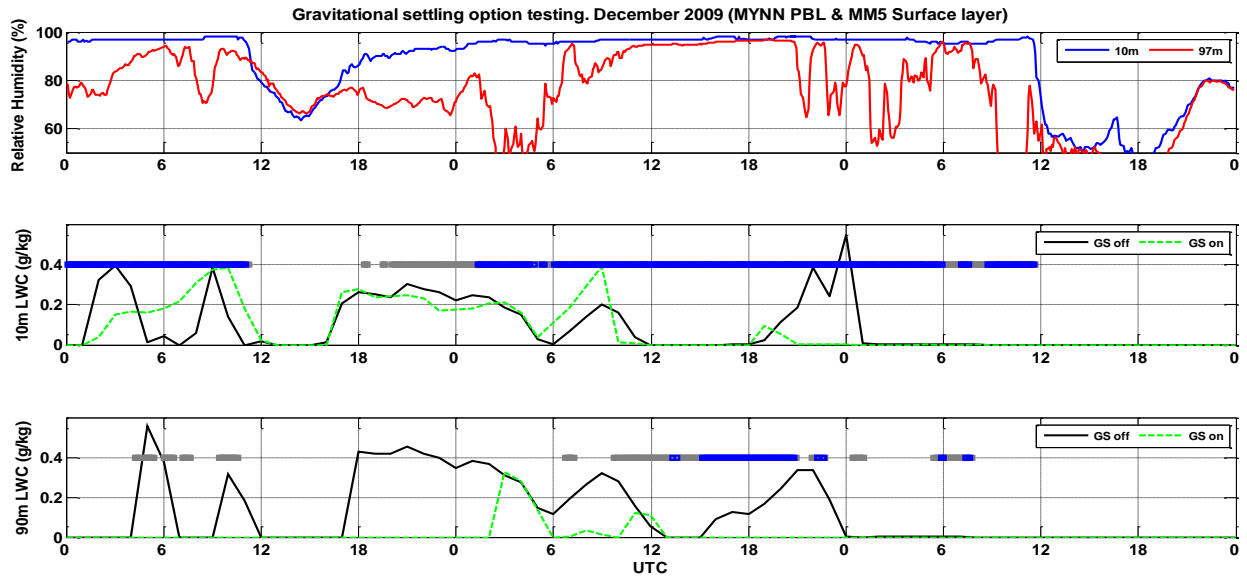

Figure 7 - Gravitational settling (GS) testing for MYNN PBL parameterization and MM5 SL parameterization for 10, 11 and 12 December 2009 at CIBA. a) Observed relative humidity at 10m (blue line) and 97m (red line). b) Simulated LWC at 10m without GS option (black line) and with GS option (dashed green line). Blue and grey bars indicate moments with observed relative humidity at 10m larger than 95% and 90% respectively. c) Same as b for 97m. Blue and grey rectangles indicate the same as in b but for 97m.

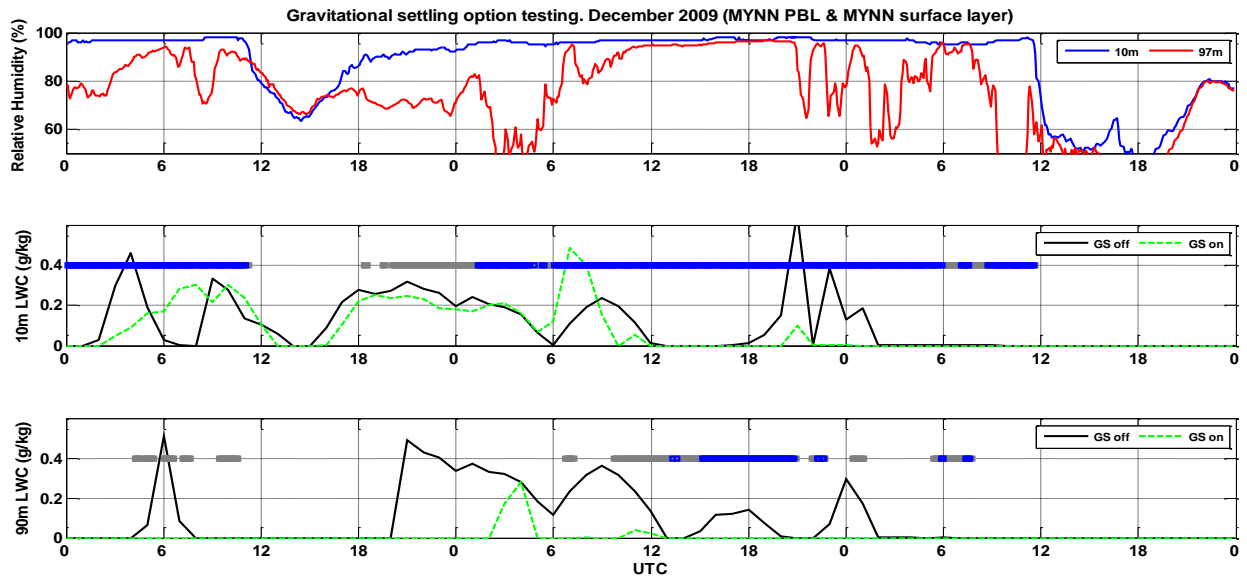

Figure 8 - Gravitational settling (GS) testing for MYNN PBL parameterization and MYNN SL parameterization for 10, 11 and 12 December 2009 at CIBA. a) Observed relative humidity at 10m (blue line) and 97m (red line). b) Simulated LWC at 10m without GS option (black line) and with GS option (dashed green line). Blue and grey bars indicate moments with observed relative humidity at 10m larger than 95% and 90% respectively. c) Same as b for 97m. Blue and grey rectangles indicate the same as in b but for 97m.

# NOVEMBER 2010

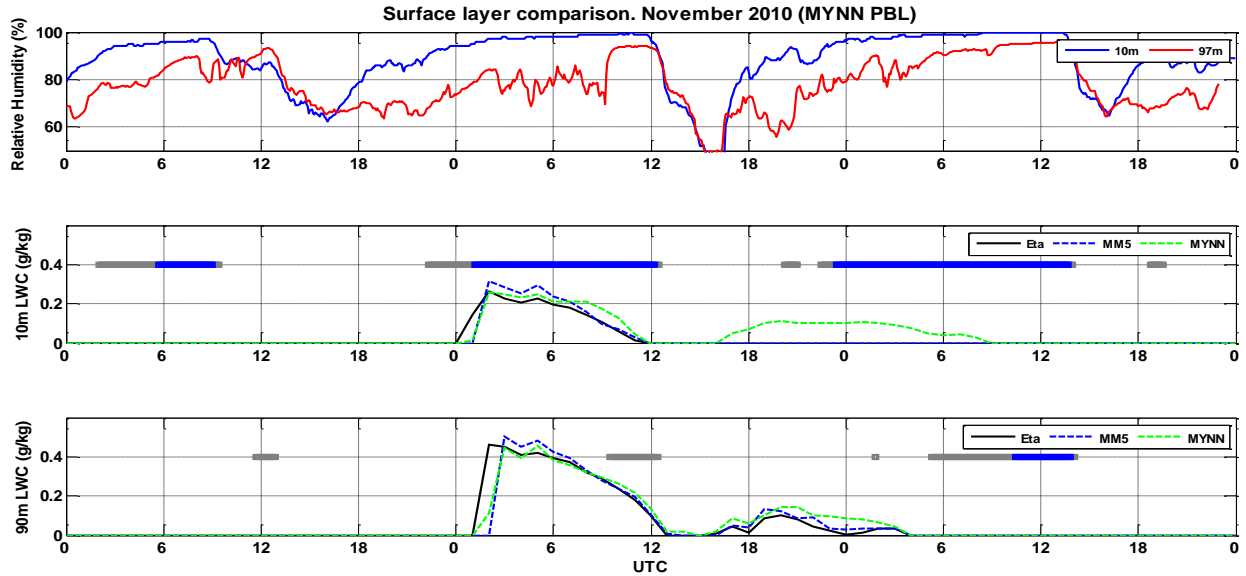

Figure 9 - Surface Layer (SL) parameterization comparison for 4, 5 and 6 November 2010 at CIBA (MYNN PBL parameterization used). a) Observed relative humidity at 10m (blue line) and 97m (red line). b) Simulated LWC at 10m for Eta SL parameterization (black line), MM5 SL parameterization (dashed purple line) and MYNN SL parameterization (dashed green line). Blue and grey bars indicate moments with observed relative humidity at 10m larger than 95% and 90% respectively. c) Same as b for 90m. Blue and grey rectangles indicate the same as in b but for 97m.

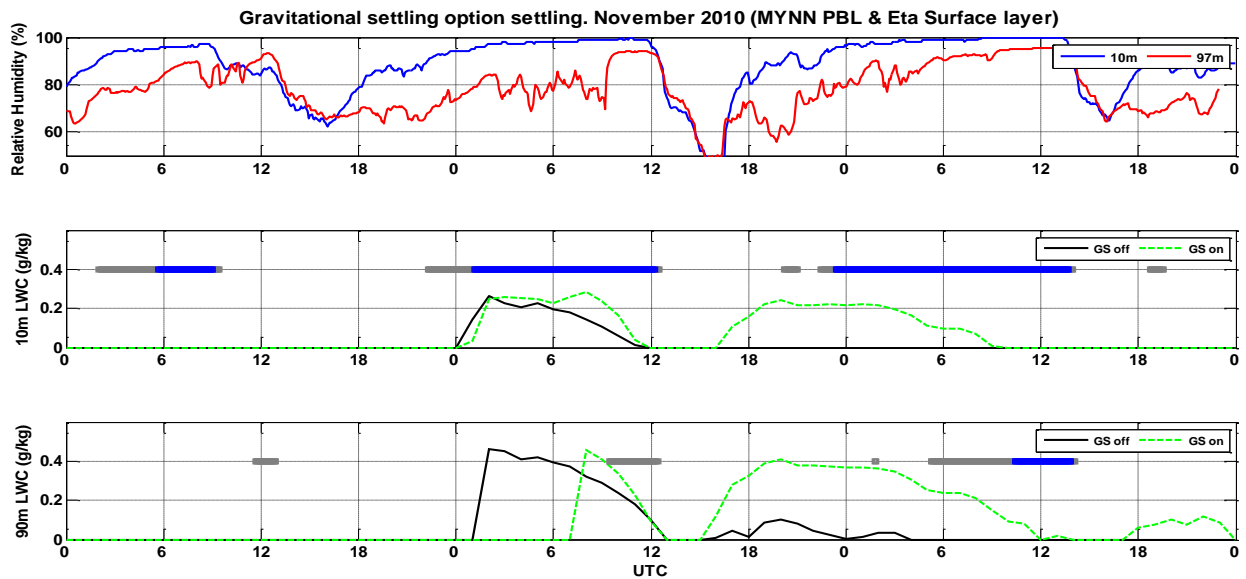

Figure 10 - Gravitational settling (GS) testing for MYNN PBL parameterization and Eta SL parameterization for 4, 5 and 6 November 2010 at CIBA. a) Observed relative humidity at 10m (blue line) and 97m (red line). b) Simulated LWC at 10m without GS option (black line) and with GS option (dashed green line). Blue and grey bars indicate moments with observed relative humidity at 10m larger than 95% and 90% respectively. c) Same as b for 97m. Blue and grey rectangles indicate the same as in b but for 97m.

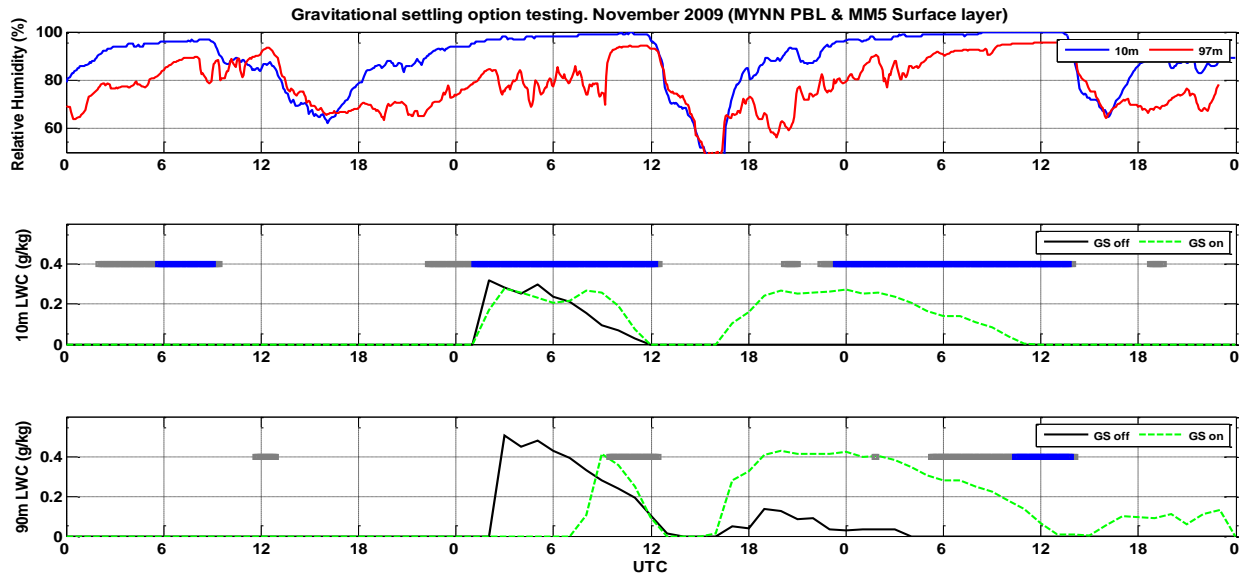

Figure 11 - Gravitational settling (GS) testing for MYNN PBL parameterization and MM5 SL parameterization for 4, 5 and 6 November 2010 at CIBA. a) Observed relative humidity at 10m (blue line) and 97m (red line). b) Simulated LWC at 10m without GS option (black line) and with GS option (dashed green line). Blue and grey bars indicate moments with observed relative humidity at 10m larger than 95% and 90% respectively. c) Same as b for 97m. Blue and grey rectangles indicate the same as in b but for 97m.

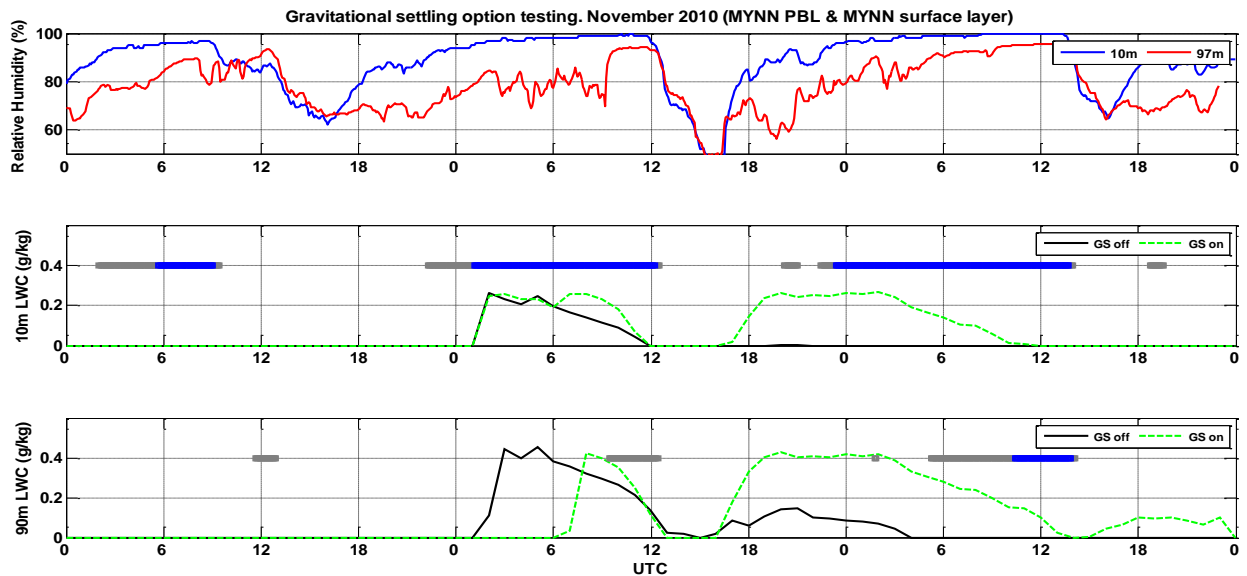

Figure 12 - Gravitational settling (GS) testing for MYNN PBL parameterization and MYNN SL parameterization for 4, 5 and 6 November 2010 at CIBA. a) Observed relative humidity at 10m (blue line) and 97m (red line). b) Simulated LWC at 10m without GS option (black line) and with GS option (dashed green line). Blue and grey bars indicate moments with observed relative humidity at 10m larger than 95% and 90% respectively. c) Same as b for 97m. Blue and grey rectangles indicate the same as in b but for 97m.
