# Supplementary material for: Observations and WRF simulations of fog events at the Spanish Northern Plateau
Source: Copernicus journal article supplement (doi:10.5194/asr-8-11-2012), 2012-02-28
Supplement: Supplementary file 1 [file asr-8-11-2012-supplement.zip › Supplemental Information 3.pdf]

# RMSE

| 10-11-12 nov-09       | MYJ          | QNSE         | MYNN MM5    | MYNN MM5 GS | MYNN Eta     | MYNN Eta GS  | MYNN MYNN GS | MYNN MYNN GS |
|-----------------------|--------------|--------------|-------------|-------------|--------------|--------------|--------------|--------------|
| 2m Temperature        | 3,03         | 3,24         | 3,12        | 3,29        | 3,03         | 3,05         | <b>2,99</b>  | 3,24         |
| 10m Relative Humidity | <b>13,00</b> | 15,33        | 13,55       | 14,35       | 14,21        | 13,58        | 13,34        | 13,96        |
| 10m Wind Speed        | 2,55         | 2,37         | 2,39        | 2,37        | 2,54         | 2,51         | <b>2,32</b>  | <b>2,32</b>  |
| Mixing ratio          | 0,83         | 0,73         | <b>0,60</b> | 0,68        | 0,61         | 0,67         | 0,61         | 0,65         |
| Sensible Heat Flux    | <b>30,93</b> | 33,30        | 32,68       | 33,96       | 33,87        | 34,58        | 33,44        | 32,28        |
| Friction velocity     | 0,72         | 0,74         | 0,71        | 0,72        | 0,72         | 0,72         | 0,71         | 0,72         |
| nov-09 (fogs)         |              |              |             |             |              |              |              |              |
| 2m Temperature        | 2,22         | 2,08         | 2,00        | 2,20        | <b>1,89</b>  | 2,13         | 2,01         | 2,19         |
| 10m Relative Humidity | 2,55         | 3,02         | 2,79        | 2,70        | 2,80         | 2,74         | 2,59         | <b>2,54</b>  |
| 10m Wind Speed        | 3,42         | <b>3,08</b>  | 3,39        | 3,32        | 3,82         | 3,83         | 3,40         | 3,31         |
| Mixing ratio          | 1,21         | 1,07         | 1,00        | 1,08        | <b>0,97</b>  | 1,09         | 1,02         | 1,06         |
| Sensible Heat Flux    | 19,95        | <b>18,22</b> | 18,33       | 18,76       | 20,89        | 20,67        | 19,14        | 18,61        |
| Friction velocity     | 0,43         | 0,44         | 0,39        | 0,41        | 0,40         | 0,41         | 0,39         | 0,41         |
| 10-11-12 dec-09       | MYJ          | QNSE         | MYNN MM5    | MYNN MM5 GS | MYNN Eta     | MYNN Eta GS  | MYNN MYNN GS | MYNN MYNN GS |
| 2m Temperature        | 2,87         | 2,73         | 2,29        | 1,75        | 2,38         | <b>1,66</b>  | 2,42         | 1,86         |
| 10m Relative Humidity | 19,03        | 10,49        | 7,59        | 7,38        | 8,08         | <b>6,86</b>  | 8,39         | 8,66         |
| 10m Wind Speed        | 1,08         | 0,92         | <b>0,86</b> | 0,93        | 0,94         | 1,03         | 0,87         | 0,89         |
| Mixing ratio          | 0,57         | 0,62         | 0,57        | 0,52        | 0,60         | <b>0,46</b>  | 0,57         | 0,57         |
| Sensible Heat Flux    | 27,27        | 23,52        | 24,52       | 26,80       | <b>21,17</b> | 25,02        | 26,01        | 27,50        |
| Friction velocity     | 0,37         | 0,37         | 0,37        | 0,37        | 0,37         | 0,37         | 0,37         | 0,37         |
| dec-09 (fogs)         |              |              |             |             |              |              |              |              |
| 2m Temperature        | 3,54         | 1,32         | 1,30        | 1,18        | 1,35         | 1,18         | 1,32         | <b>1,10</b>  |
| 10m Relative Humidity | 23,61        | 4,50         | 3,92        | 6,36        | 4,34         | 6,08         | <b>3,81</b>  | 8,32         |
| 10m Wind Speed        | 0,79         | 0,66         | <b>0,55</b> | 0,66        | 0,66         | 0,76         | 0,63         | 0,66         |
| Mixing ratio          | 0,67         | 0,55         | 0,56        | 0,53        | 0,58         | <b>0,48</b>  | 0,55         | 0,57         |
| Sensible Heat Flux    | 20,13        | 13,67        | 15,09       | 15,60       | <b>13,30</b> | 16,40        | 16,17        | 15,51        |
| Friction velocity     | 0,07         | 0,06         | 0,07        | 0,07        | 0,07         | 0,07         | 0,07         | 0,07         |
| 4-5-6 nov-10          | MYJ          | QNSE         | MYNN MM5    | MYNN MM5 GS | MYNN Eta     | MYNN Eta GS  | MYNN MYNN GS | MYNN MYNN GS |
| 2m Temperature        | 3,28         | 3,75         | 3,18        | 3,20        | 3,20         | 3,16         | 3,22         | <b>3,08</b>  |
| 10m Relative Humidity | <b>10,08</b> | 10,61        | 10,75       | 11,22       | 10,91        | 11,14        | 11,00        | 10,57        |
| 10m Wind Speed        | <b>1,06</b>  | 1,09         | 1,20        | 1,11        | 1,35         | 1,15         | 1,28         | 1,25         |
| Mixing ratio          | 1,28         | 1,31         | 1,22        | 1,12        | 1,22         | <b>1,11</b>  | 1,24         | <b>1,11</b>  |
| Sensible Heat Flux    | 41,00        | 39,03        | 39,86       | 36,25       | 37,58        | <b>34,11</b> | 40,45        | 38,69        |
| Friction velocity     | 0,15         | 0,15         | 0,15        | 0,15        | 0,15         | 0,14         | 0,15         | 0,15         |
| nov-10 (fogs)         |              |              |             |             |              |              |              |              |
| 2m Temperature        | 2,98         | 2,58         | 2,71        | 2,26        | 2,77         | <b>2,23</b>  | 2,85         | 2,28         |
| 10m Relative Humidity | 5,85         | 5,08         | 5,66        | <b>1,78</b> | 5,91         | 2,25         | 5,75         | 1,89         |
| 10m Wind Speed        | 1,15         | <b>0,91</b>  | 1,28        | <b>0,91</b> | 1,47         | 1,02         | 1,39         | 1,12         |
| Mixing ratio          | 1,48         | 1,33         | 1,34        | <b>1,19</b> | 1,36         | <b>1,19</b>  | 1,41         | <b>1,19</b>  |
| Sensible Heat Flux    | 44,39        | 44,39        | 43,84       | 38,58       | 41,92        | <b>35,70</b> | 43,30        | 40,91        |
| Friction velocity     | 0,15         | 0,14         | 0,14        | 0,14        | 0,14         | 0,14         | 0,15         | 0,15         |

Table 1. RMSE calculated for several parameters and for different options of the model. Lowest values are indicated in bold.

## BIAS

| 10-11-12 nov-09       | MYJ          | QNSE         | MYNN MM5     | MYNN MM5 GS  | MYNN Eta     | MYNN Eta GS   | MYNN MYNN GS | MYNN MYNN GS |
|-----------------------|--------------|--------------|--------------|--------------|--------------|---------------|--------------|--------------|
| 2m Temperature        | <b>-1,51</b> | -2,13        | -1,59        | -1,78        | -1,69        | -1,68         | -1,55        | -1,83        |
| 10m Relative Humidity | <b>9,60</b>  | 12,85        | 9,30         | 10,28        | 10,74        | <b>10,30</b>  | 9,74         | 9,95         |
| 10m Wind Speed        | 0,97         | 0,59         | 0,91         | <b>0,58</b>  | 1,19         | 1,09          | 1,05         | 0,63         |
| Mixing ratio          | 0,12         | 0,09         | 0,08         | 0,07         | 0,14         | 0,12          | 0,12         | <b>0,02</b>  |
| Sensible Heat Flux    | -6,57        | <b>-4,04</b> | -6,50        | -7,03        | -6,76        | -7,44         | -5,70        | -6,56        |
| Friction velocity     | -0,50        | -0,51        | -0,48        | -0,50        | -0,50        | -0,50         | <b>-0,47</b> | -0,50        |
| nov-09 (fogs)         |              |              |              |              |              |               |              |              |
| 2m Temperature        | 0,77         | <b>0,38</b>  | 0,89         | 0,81         | 0,74         | 0,77          | 0,91         | 0,57         |
| 10m Relative Humidity | 2,09         | 2,88         | 1,17         | 1,10         | 1,92         | 1,77          | 1,62         | <b>1,02</b>  |
| 10m Wind Speed        | 2,34         | <b>2,20</b>  | 2,61         | 2,28         | 2,94         | 2,89          | 2,69         | <b>2,20</b>  |
| Mixing ratio          | 0,55         | 0,41         | 0,54         | 0,51         | 0,51         | 0,54          | 0,58         | <b>0,39</b>  |
| Sensible Heat Flux    | -5,19        | -2,62        | -1,70        | -0,65        | -3,01        | -1,40         | <b>-0,80</b> | -1,08        |
| Friction velocity     | -0,28        | -0,28        | <b>-0,23</b> | -0,25        | -0,25        | -0,25         | <b>-0,23</b> | -0,26        |
| 10-11-12 dec-09       | MYJ          | QNSE         | MYNN MM5     | MYNN MM5 GS  | MYNN Eta     | MYNN Eta GS   | MYNN MYNN GS | MYNN MYNN GS |
| 2m Temperature        | 1,87         | -1,01        | -1,00        | -1,10        | <b>-0,89</b> | -0,97         | -1,07        | -1,07        |
| 10m Relative Humidity | -12,38       | 4,78         | 3,89         | 1,73         | 3,94         | 2,30          | 4,32         | <b>1,54</b>  |
| 10m Wind Speed        | 0,28         | 0,17         | -0,08        | <b>-0,03</b> | 0,17         | 0,30          | 0,09         | 0,04         |
| Mixing ratio          | -0,09        | <b>-0,08</b> | -0,14        | -0,29        | -0,10        | -0,21         | -0,14        | -0,30        |
| Sensible Heat Flux    | -17,10       | <b>-1,59</b> | -4,35        | -7,89        | -1,94        | -3,43         | -5,90        | -9,67        |
| Friction velocity     | -0,13        | -0,10        | -0,10        | -0,10        | -0,10        | -0,10         | -0,10        | -0,10        |
| dec-09 (fogs)         |              |              |              |              |              |               |              |              |
| 2m Temperature        | 3,18         | 0,36         | <b>-0,02</b> | -0,53        | 0,25         | -0,38         | <b>-0,02</b> | -0,32        |
| 10m Relative Humidity | -18,93       | <b>0,11</b>  | 1,55         | -0,30        | 0,78         | 0,12          | 1,13         | -1,31        |
| 10m Wind Speed        | 0,45         | 0,33         | <b>-0,02</b> | 0,09         | 0,21         | 0,47          | 0,09         | 0,05         |
| Mixing ratio          | -0,04        | 0,10         | 0,03         | -0,23        | 0,09         | -0,16         | <b>0,01</b>  | -0,22        |
| Sensible Heat Flux    | -15,04       | 4,45         | <b>-1,51</b> | -4,34        | 2,22         | 2,03          | -2,96        | -5,88        |
| Friction velocity     | -0,02        | 0,02         | 0,02         | 0,02         | 0,02         | 0,02          | 0,02         | 0,02         |
| 4-5-6 nov-10          | MYJ          | QNSE         | MYNN MM5     | MYNN MM5 GS  | MYNN Eta     | MYNN Eta GS   | MYNN MYNN GS | MYNN MYNN GS |
| 2m Temperature        | 0,42         | -1,15        | <b>0,03</b>  | -0,55        | 0,10         | -0,49         | 0,16         | -0,30        |
| 10m Relative Humidity | 0,20         | 4,56         | 0,14         | 2,59         | 0,08         | 2,49          | <b>-0,07</b> | 2,00         |
| 10m Wind Speed        | <b>0,29</b>  | 0,51         | 0,64         | 0,56         | 0,87         | 0,71          | 0,85         | 0,81         |
| Mixing ratio          | 0,21         | -0,17        | <b>0,01</b>  | -0,08        | 0,04         | -0,06         | 0,06         | <b>-0,01</b> |
| Sensible Heat Flux    | -15,19       | 22,63        | -14,35       | -8,56        | -13,66       | <b>-7,16</b>  | -14,29       | -9,75        |
| Friction velocity     | -0,01        | 0,01         | 0,02         | 0,02         | 0,02         | 0,02          | 0,02         | 0,01         |
| nov-10 (fogs)         |              |              |              |              |              |               |              |              |
| 2m Temperature        | 2,13         | 1,57         | 1,62         | <b>0,58</b>  | 1,68         | 0,68          | 1,74         | 0,87         |
| 10m Relative Humidity | -3,62        | -3,05        | -3,12        | <b>-0,07</b> | -3,29        | -0,40         | -3,18        | -0,58        |
| 10m Wind Speed        | <b>0,53</b>  | 0,55         | 1,00         | <b>0,53</b>  | 1,23         | 0,70          | 1,16         | 0,79         |
| Mixing ratio          | 0,71         | 0,47         | 0,49         | 0,22         | 0,51         | 0,24          | 0,55         | <b>0,32</b>  |
| Sensible Heat Flux    | -22,12       | -20,32       | -22,35       | -17,32       | -20,65       | <b>-14,92</b> | -22,01       | -18,38       |
| Friction velocity     | -0,02        | -0,02        | 0,01         | -0,01        | 0,01         | -0,01         | 0,01         | -0,01        |

Table 2. Bias calculated for several parameters and for different options of the model. Lowest absolute values are indicated in bold.

**MYJ** – Mellor Yamada Janjic PBL.

**QNSE** – Quasi Normal Scale Elimination PBL.

**MYNN MM5** – Mellor Jamada Nakanishi Niino 2.5 Level PBL. MM5 surface layer.

**MYNN MM5 GS** – Mellor Jamada Nakanishi Niino 2.5 Level PBL. MM5 surface layer. Gravity settling option activated.

**MYNN Eta** - Mellor Jamada Nakanishi Niino 2.5 Level PBL. Eta surface layer.

**MYNN Eta GS** – Mellor Jamada Nakanishi Niino 2.5 Level PBL. Eta surface layer. Gravity settling option activated.

**MYNN MYNN** – Mellor Jamada Nakanishi Niino 2.5 Level PBL. MYNN surface layer.

**MYNN MYNN GS** – Mellor Jamada Nakanishi Niino 2.5 Level PBL. MYNN surface layer. Gravity settling option activated.
